# Supplementary material for: Cloud droplet number closure for tropical convective clouds duringthe ACRIDICON–CHUVA campaign
Source: Copernicus journal article supplement (doi:10.5194/acp-2021-80), 2021-03-16
Supplement: Supplementary file 1 [file acp-2021-80-supplement.pdf]

## *Supplement of*

# **Cloud droplet number closure in tropical convective clouds during the ACRIDICON-CHUVA campaign**

**Ramon Campos Braga et al.**

*Correspondence to: Ramon Campos Braga (r.braga@mpic.de) or Mira L. Pöhlker (m.pohlker@mpic.de)*

## **1 SM- Tables**

**Table S1.** Characterization of aerosol size distributions. Measurements were performed during Flight AC07. Time frame of averaged below cloud period: 6-09-2014 17:53:00 to 17:55:25 UTC

| Parameter                     | Mean |
|-------------------------------|------|
| Altitude [m asl.]             | 1800 |
| Air Temperature [°C]          | 18   |
| Pressure [hPa]                | 820  |
| Relative Humidity [%]         | 95   |
| $N_a$ [cm <sup>-3</sup> ]     | 1825 |
| $N_{acc}$ [cm <sup>-3</sup> ] | 1825 |
| $d_{acc}$ [nm]                | 147  |

**Table S2.** Characterization of aerosol size distributions. Measurements were performed during Flight AC09. Time frame of averaged below cloud period: 11-09-2014 15:31:31 to 15:38:20 UTC.

| Parameter                     | Mean |
|-------------------------------|------|
| Altitude [m asl.]             | 933  |
| Air Temperature [°C]          | 22.5 |
| Pressure [hPa]                | 938  |
| Relative Humidity [%]         | 87   |
| $N_a$ [cm <sup>-3</sup> ]     | 785  |
| $N_{acc}$ [cm <sup>-3</sup> ] | 785  |
| $d_{acc}$ [nm]                | 145  |

**Table S3.** Characterization of aerosol size distributions. Measurements were performed during Flight AC18. Time frame of averaged below cloud period: 28-09-2014 16:39:00 to 16:43:59 UTC.

| Parameter                     | Mean |
|-------------------------------|------|
| Altitude [m asl.]             | 1286 |
| Air Temperature [°C]          | 20.7 |
| Pressure [hPa]                | 876  |
| Relative Humidity [%]         | 81.8 |
| $N_a$ [cm <sup>-3</sup> ]     | 657  |
| $N_{acc}$ [cm <sup>-3</sup> ] | 657  |
| $d_{acc}$ [nm]                | 140  |

**Table S4.** Characterization of aerosol size distributions. Measurements were performed during Flight AC19. Time frame of averaged below cloud period: 30-09-2014 17:23:38 to 17:27:31 UTC.

| Parameter                     | Mean |
|-------------------------------|------|
| Altitude [m asl.]             | 452  |
| Air Temperature [°C]          | 23.5 |
| Pressure [hPa]                | 960  |
| Relative Humidity [%]         | 93.7 |
| $N_a$ [cm <sup>-3</sup> ]     | 488  |
| $N_{ait}$ [cm <sup>-3</sup> ] | 224  |
| $N_{acc}$ [cm <sup>-3</sup> ] | 264  |
| $d_{ait}$ [nm]                | 37   |
| $d_{acc}$ [nm]                | 136  |

## 2 SM- Figures

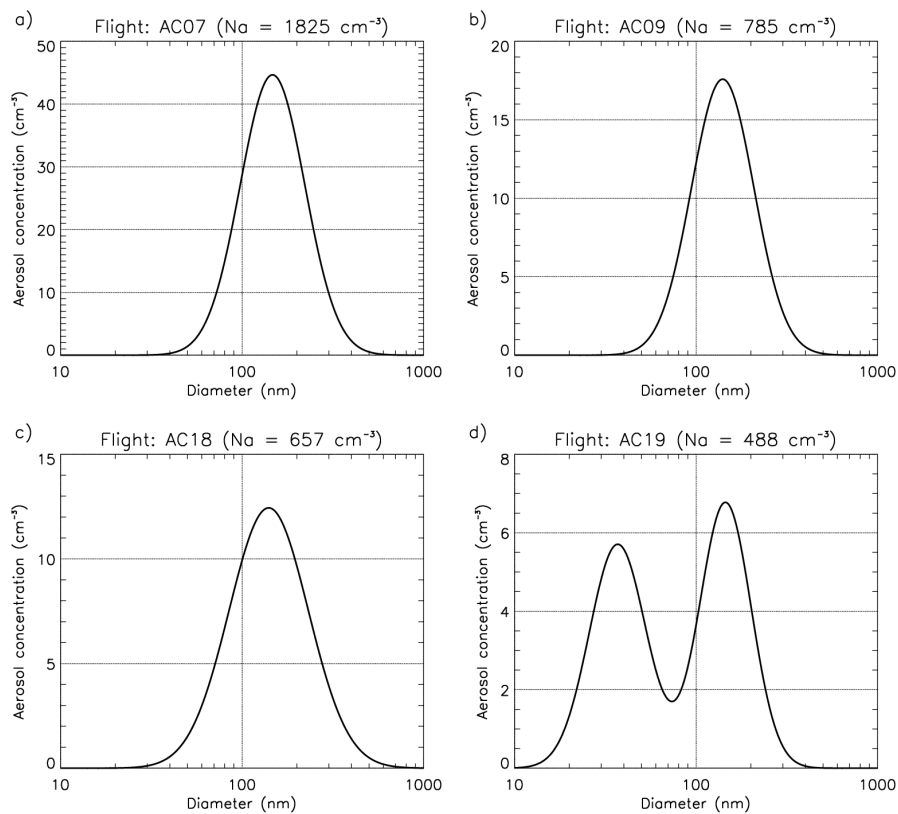

**Figure S1.** Average aerosol size distribution measured below cloud bases during flights: a) AC07, b) AC09, c) AC18 and d) AC19. The number concentration of aerosol particles ( $N_a$ ) is shown on the top of each panel. The regions of measurements are shown in Fig.1.

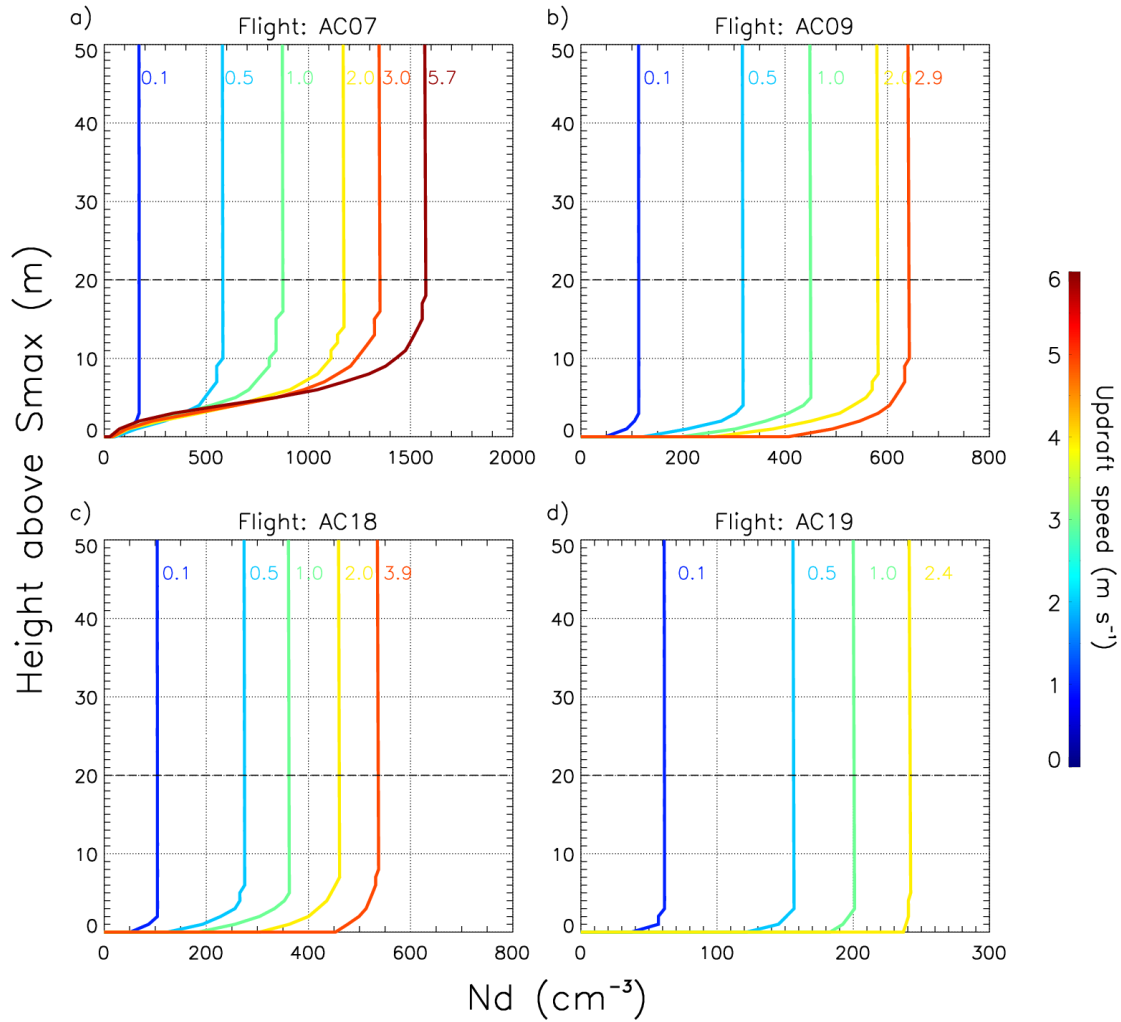

**Figure S2.** Predicted Nd for heights above the level of  $S_{max}$  as a function of  $w$  (indicated on the right side of each line) for flights: a) AC07, b) AC09, c) AC18 and d) AC19. The values of  $w$  assumed on simulations range the measured values during cloud passes near cloud bases in each flight. The horizontal dashed line indicates the level of 20 m above  $S_{max}$ .

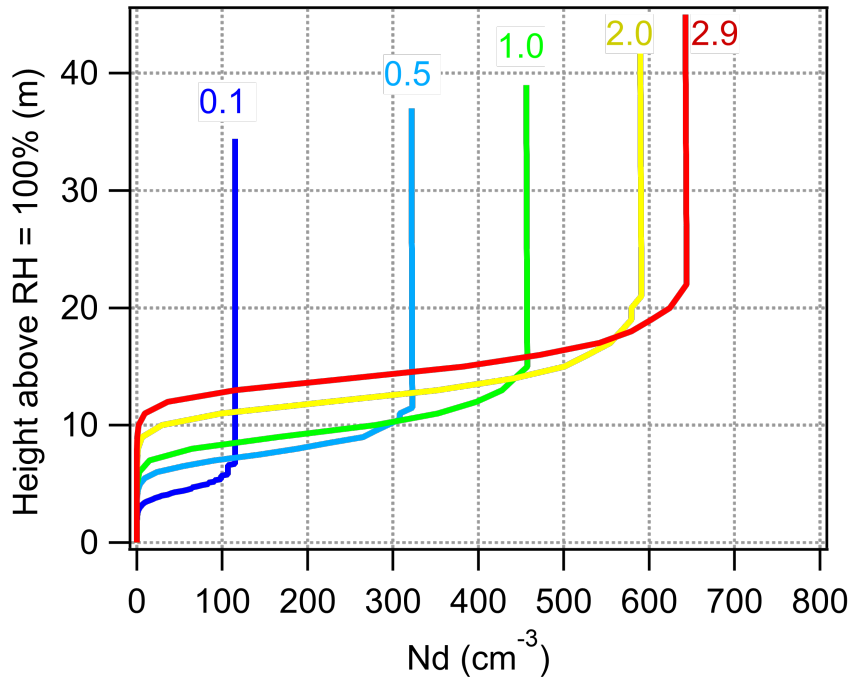

**Figure S3.** Predicted  $N_d$  for AC09 at heights [m] above the level at which  $\text{RH} = 100\%$  in order to demonstrate the various absolute heights above  $S_{\text{max}}$  as a function of updraft speed. These are the same  $N_{d,p}$  values as shown in Figure S2b. Updraft speeds in  $\text{m s}^{-1}$  are indicated at the top of the colored lines.
